# Supplementary material for: Frequency of EBV LMP-1 Promoter and Coding Variations in Burkitt Lymphoma Samples in Africa and South America and Peripheral Blood in Uganda
Source: PubMed Central journal article supplement (PMC6024959; doi:10.3390/cancers10060177), 2018-06-02
Supplement: cancers-10-00177-s001.pdf [file cancers-10-00177-s001.pdf]

1 **Supplementary Materials: Frequency of EBV LMP-1**  
 2 **Promoter and Coding Variations in Burkitt**  
 3 **Lymphoma Samples in Africa and South America and**  
 4 **Peripheral Blood in Uganda**

5 Hsiao-Mei Liao, Hebing Liu, Heiyan Lei, Bingjie Li, Pei-Ju Chin, Shien Tsai, Kishor Bhatia,  
 6 Marina Gutierrez, Sidnei Epelman, Robert J Biggar, Francis Nkrumah, Janet Neequaye, Martin  
 7 D. Ogwang, Steven J. Reynolds, Shyh-Ching Lo and Sam M. Mbulaiteye

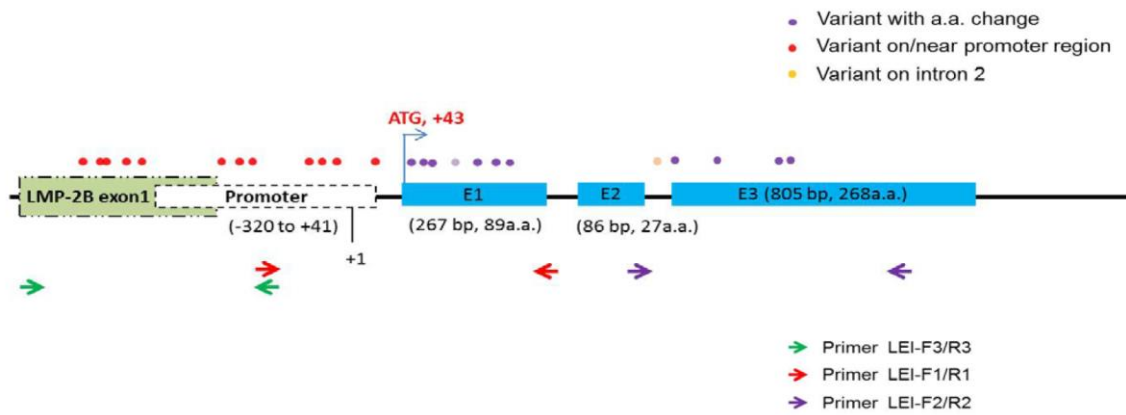

8  
 9 Figure S1: The illustration of the corresponding positions of the 23 single nucleotide variants that form  
 10 the pattern A on LMP-1 gene and the primers used for the variant typing via target-specific PCR and  
 11 Sanger sequencing

12

13

Table S1: Heterogeneous variations in the LMP-1 gene suggestive of co-infection with Pattern A and Pattern D EBV in 2 BL tumors from Ghana.

| Gene region          |                    |             | LMP-2B exon 1    |                  |                  |                  |                  | LMP-1 promoter       |                  |                  |                 |                  | LMP-1 exon1      |              |                    |                    |                    |               |                    | LMP-1 exon3        |                    |                    |                    |                    |                    |                    |  |  |
|----------------------|--------------------|-------------|------------------|------------------|------------------|------------------|------------------|----------------------|------------------|------------------|-----------------|------------------|------------------|--------------|--------------------|--------------------|--------------------|---------------|--------------------|--------------------|--------------------|--------------------|--------------------|--------------------|--------------------|--------------------|--|--|
| Primer pair          |                    |             | Lei-F3/ Lei-R3   |                  |                  |                  |                  | Lei-F1/ Lei-R1       |                  |                  |                 |                  |                  |              |                    |                    |                    |               |                    |                    |                    |                    | Lei-F2/ Lei-R2     |                    |                    |                    |  |  |
| Amplicon size        |                    |             | 396 bp           |                  |                  |                  |                  | 435 bp               |                  |                  |                 |                  |                  |              |                    |                    |                    |               |                    |                    |                    |                    | 428 bp             |                    |                    |                    |  |  |
| FT and a.a. affected |                    |             |                  |                  |                  |                  | AM<br>L1         | LBF2                 | LBF4             |                  | CREB            |                  |                  |              | E2D                | H3L                |                    | S24A<br>(new) | V43I               | S57A               | I63V               |                    | I124V              | I152L              | H213<br>N          | E214Q              |  |  |
| Variation            |                    |             | 1.<br>G-<br>426A | 2.<br>T-<br>412G | 3.<br>C-<br>410A | 4.<br>G-<br>376A | 5.<br>A-<br>354G | 6.<br>G-<br>227<br>A | 7.<br>A-<br>184T | 8.<br>T-<br>172C | 9.<br>T-<br>50A | 10.<br>A-<br>39C | 11.<br>G-<br>12A | 12.<br>T+18G | 13.<br>GAA>G<br>AC | 14.<br>CAC>C<br>TG | 15.<br>CAC>C<br>TG | TCC><br>GCC   | 16.<br>GTT><br>ATT | 17.<br>TCC><br>GCC | 18.<br>ATA>G<br>TG | 19.<br>ATA>G<br>TG | 20.<br>ATC><br>GTC | 21.<br>ATC><br>CTC | 22.<br>CAT><br>AAT | 23.<br>GAA>C<br>AA |  |  |
| Origin               | Pattern            | Sample      |                  |                  |                  |                  |                  |                      |                  |                  |                 |                  |                  |              |                    |                    |                    |               |                    |                    |                    |                    |                    |                    |                    |                    |  |  |
| Ghana                | A/D                | HU1102<br>0 | G/A              | T/G              | C/A              | G/A              | A/G              | G                    | T                | T/C              | T/A             | A/C              | G/A              | T/G          | A/C                | A/T                | C/G                | T             | G/A                | T/G                | A/G                | A/G                | A/G                | A/G                | C/A                | G/C                |  |  |
|                      | Heterozygosity (%) |             | 56.0             | 54.4             | 54.2             | 53.3             | 56.4             | 0                    | 98.7             | 52.8             | 50.6            | 54.1             | 55.9             | 55.4         | 79.4               | 55.3               | 55.3               | 0             | 56.8               | 57.1               | 57.8               | 57.8               | 49.6               | 49.6               | 49.4               | 49.5               |  |  |
|                      | A/D                | HU1328<br>1 | G/A              | T/G              | C/A              | G/A              | G                | A/T                  | T/C              | T                | A               | A                | T                | C            | A                  | C                  | T                  | G             | T                  | A                  | A                  | A/G                | A/C                | C/A                | G/C                |                    |  |  |
|                      | Heterozygosity (%) |             | 24.8             | 24.8             | 24.6             | 25.3             | 99.8             | 0                    | 24.6             | 24.8             | 0               | 0                | 99.5             | 0            | 99.7               | 0                  | 0                  | 0             | 0                  | 0                  | 0                  | 0                  | 7.3                | 7.5                | 6.5                | 6.5                |  |  |

14

15  
16

Table S2: EBV LMP-1 Patterns in 22 EBV-positive BL tumors from South America typed using PCR amplicon sequencing via Sanger method.

| Sample Name | Geographic distribution | EBV detection |     | Variant typing result |                 |
|-------------|-------------------------|---------------|-----|-----------------------|-----------------|
|             |                         | Southern Blot | PCR | LMP-1 Pattern         | Typing method   |
| CV          | Argentina               | +             | +   | A                     | HTS*/PCR-Sanger |
| VA          | Argentina               | +             | +   | A                     |                 |
| SG          | Argentina               | +             | +   | A                     |                 |
| N=3         |                         |               |     |                       |                 |
| MD          | Argentina               | +             | +   | A                     | PCR-Sanger      |
| JR          | Argentina               | -             | +   | A                     |                 |
| BD          | Argentina               | -             | +   | A                     |                 |
| RJR         | Argentina               | -             | +   | A                     |                 |
| 135         | Argentina               | -             | +   | A                     |                 |
| HD          | Argentina               | -             | +   | ML-A                  |                 |
| AF          | Argentina               | +             | +   | ML-A                  |                 |
| OJI         | Argentina               | +             | +   | D                     |                 |
| AA          | Argentina               | +             | +   | D                     |                 |
| AS          | Argentina               | -             | -   | N.D.                  |                 |
| AG          | Argentina               | -             | -   | N.D.                  |                 |
| RJ          | Argentina               | -             | -   | N.D.                  |                 |
| N=12        |                         |               |     |                       |                 |
| FNR         | Brazil                  | +             | +   | A                     | HTS*/PCR-Sanger |
| CCH         | Brazil                  | +             | +   | A                     |                 |
| RPF         | Brazil                  | +             | +   | A                     |                 |
| MP          | Brazil                  | +             | +   | A                     |                 |
| SCL         | Brazil                  | +             | +   | A                     |                 |
| VGO         | Brazil                  | +             | +   | B                     |                 |
| N=6         |                         |               |     |                       |                 |
| SRC         | Brazil                  | -             | +   | A                     | PCR-Sanger      |
| IN          | Brazil                  | -             | +   | A                     |                 |
| BE          | Brazil                  | -             | +   | A                     |                 |
| ND          | Brazil                  | -             | +   | D                     |                 |
| ME          | Brazil                  | -             | -   | N.D.                  |                 |
| N=5         |                         |               |     |                       |                 |

17

18

19  
20

Table S3: EBV LMP-1 Patterns in 42 EBV positive BL tumors from Ghana typed using PCR amplicon sequencing via Sanger method.

| Sample name | Geographic distribution | EBV Detection |     | Variant typing result |                              |
|-------------|-------------------------|---------------|-----|-----------------------|------------------------------|
|             |                         | Southern Blot | PCR | LMP-1 Pattern         | Typing Method                |
| H058015C    | Ghana                   | +             | +   | A                     | HTS <sup>†</sup> /PCR-Sanger |
| HU11393     | Ghana                   | +             | +   | A                     |                              |
| H018436D    | Ghana                   | +             | +   | A                     |                              |
| H002213     | Ghana                   | +             | +   | A                     |                              |
| H03753A     | Ghana                   | +             | +   | A                     |                              |
| N= 5        |                         |               |     |                       |                              |
| H02212D     | Ghana                   |               | +   | A                     | PCR-Sanger (N=40)            |
| HU11541     | Ghana                   |               | +   | A                     |                              |
| HU11595     | Ghana                   |               | +   | A                     |                              |
| HU12335     | Ghana                   |               | +   | A                     |                              |
| HU11308     | Ghana                   |               | +   | A                     |                              |
| HU12208     | Ghana                   |               | +   | A                     |                              |
| HU11394     | Ghana                   |               | +   | A                     |                              |
| HU10416     | Ghana                   |               | +   | A                     |                              |
| HU10377     | Ghana                   |               | +   | A                     |                              |
| HU13148     | Ghana                   |               | +   | A                     |                              |
| HU11813     | Ghana                   |               | +   | A                     |                              |
| H057519a    | Ghana                   |               | +   | A                     |                              |
| H058001a    | Ghana                   |               | +   | A                     |                              |
| H057520a    | Ghana                   |               | +   | A                     |                              |
| H057521a    | Ghana                   |               | +   | A                     |                              |
| H003840a    | Ghana                   |               | +   | A                     |                              |
| HU13312     | Ghana                   |               | +   | A                     |                              |
| HU14473     | Ghana                   |               | +   | A                     |                              |
| N= 18       |                         |               |     |                       |                              |
| HU14163     | Ghana                   |               | +   | ML-A                  |                              |
| HU11386     | Ghana                   |               | +   | ML-A                  |                              |
| HU14250     | Ghana                   |               | +   | ML-A                  |                              |
| HU10615     | Ghana                   |               | +   | ML-A                  |                              |
| HU10612     | Ghana                   |               | +   | ML-A                  |                              |
| N= 5        |                         |               |     |                       |                              |
| HU13265     | Ghana                   |               | +   | C                     |                              |
| N= 1        |                         |               |     |                       |                              |
| HU10552     | Ghana                   |               | +   | D                     |                              |
| HU11303     | Ghana                   |               | +   | D                     |                              |

|            |       |  |   |         |
|------------|-------|--|---|---------|
| HU11469    | Ghana |  | + | D       |
| HU11344    | Ghana |  | + | D       |
| HU10496    | Ghana |  | + | D       |
| HU11361    | Ghana |  | + | D       |
| HU11589    | Ghana |  | + | D       |
| HU14219    | Ghana |  | + | D       |
| HU10244    | Ghana |  | + | D       |
| H057518a   | Ghana |  | + | D       |
| H031201b   | Ghana |  | + | D       |
| N= 11      |       |  |   |         |
| HU12078    | Ghana |  | - | N.D.    |
| HU12317    | Ghana |  | - | N.D.    |
| HU14423    | Ghana |  | - | N.D.    |
| N= 3       |       |  |   |         |
| HU11020    | Ghana |  | + | Mix A/D |
| HU13281    | Ghana |  | + | Mix A/D |
| N= 2       |       |  |   |         |
| Total N=45 |       |  |   |         |

21 Notes: These samples include 5 that previously were typed using whole genome high-throughput sequencing  
 22 #: The partial genome and the addressed LMP-1 variant pattern has been published by Lei, H., et al. on *Sci Rep*  
 23 5: 16706 (2015).  
 24 N.D.: undetected

25 ML-A: 12 or 13 serial variants (variants number 11 to 23 or 12 to 23 on table 1) of the 23 Pattern A  
 26 variants presented in the sample were assigned as Middle Length pattern A.

27 Table S4: The primers were used for PCR amplifying the hypervariable region of the LMP-1 and  
 28 Sanger Sequencing.

| Primer Name | Sequence 5' to 3'         | Amplicon Length (bp) | Tm (°C) |
|-------------|---------------------------|----------------------|---------|
| LEI-1F      | GCCTCCGGCAGACCCCGCAAATC   | 435                  | 55      |
| LEI-1R      | GGGCAAAGGGTGTAACTTAC      |                      |         |
| LEI-2F      | CCTTGAATTGTGCTGTCA        | 428                  | 55      |
| LEI-2R      | TCTGCCCTCGTTGGAGTTAG      |                      |         |
| LEI-3F      | GTCTGCTGCTTCGTCACCCGCCGAC | 396                  | 60      |
| LEI-3R      | GATTTGCGGGGTCTGCCGGAGGC   |                      |         |

29

30

31 Table S5: The summary of the Lei et al. pattern classification applied on the samples from BL cases  
 32 and healthy donors that had been used for LMP-1 phylogenic analysis in the study of Correia et al.  
 33 (2017). Table S6: The geographic distribution and the Pattern A-D classification of the BL cases and  
 34 healthy donors that were used in the study of Correia et al. (2017).

|                  | BL tumor<br>biopsy (N=3) | BL Cell line (N=16) | Saliva<br>from BL<br>patient<br>(N=4) |   | Total BL cases<br>(N=23) | healthy saliva,<br>sLCL<br>(N= 59) |
|------------------|--------------------------|---------------------|---------------------------------------|---|--------------------------|------------------------------------|
| <b>Pattern A</b> | 3 (Argentina)            | 1<br>(Africa)       | 0                                     | N | 4                        | 0                                  |
|                  |                          |                     |                                       | % | 17.4%                    | 0.0%                               |
| <b>Pattern B</b> | 0                        | 2<br>(Africa)       | 0                                     | N | 2                        | 30                                 |
|                  |                          |                     |                                       | % | 8.7%                     | 50.8%                              |
| <b>Pattern C</b> | 0                        |                     | 1<br>(Africa)                         | N | 1                        | 3                                  |
|                  |                          |                     |                                       | % | 4.3%                     | 5.1%                               |
| <b>Pattern D</b> | 0                        | 13<br>(Africa)      | 3<br>(Africa)                         | N | 16                       | 26                                 |
|                  |                          |                     |                                       | % | 69.6%                    | 44.1%                              |

35 Note: In the Correia et al. study, total sample number for LMP-1 phylogenic analysis was 190.  
 36 Eighty of the 190 samples were overlapped in the Lei et al. study. Rests of the 110 samples were  
 37 subjected to the pattern classification. The classification was based on the amino acid sequences of  
 38 each sample obtained from the Supplementary table S2 of the Correia study. The nucleotide  
 39 sequences of the LMP-1 promoter region of these samples are unavailable. The samples from BL cases  
 40 and saliva or sLCL from healthy donors of the Correia et al. study was described in this table. The  
 41 samples from other disease states in the same study were not included.

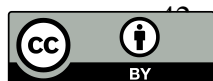

© 2018 by the authors. Submitted for possible open access publication under the terms and conditions of the Creative Commons Attribution (CC BY) license (<http://creativecommons.org/licenses/by/4.0/>).
